# Supplementary material
Source: publisher site journal article supplement (https://kjim.org/upload/media/kjim-2023-476-Supplementary-Table-3.pdf)
Supplement: Supplementary file 1 [file kjim-2023-476-Supplementary-Table-3.pdf]

**Supplementary Table 3. Chi-square test for the presence of malignancy**

| Lifestyle factor           | No history of malignancy | History of malignancy | $\chi^2$ ( $p$ ) |
|----------------------------|--------------------------|-----------------------|------------------|
| Vegetable consumption      |                          |                       |                  |
| < 5 times/wk (n = 132)     | 121 (91.70)              | 11 (8.30)             | 0.96 (0.33)      |
| $\geq$ 5 times/wk (n = 99) | 87 (87.88)               | 12 (12.12)            |                  |
| Exercise                   |                          |                       |                  |
| < 3 times/wk (n = 166)     | 150 (90.36)              | 16 (9.64)             | 0.09 (0.77)      |
| $\geq$ 3 times/wk (n = 65) | 58 (89.23)               | 7 (10.77)             |                  |

Values are presented as number (%).
